# Supplementary material for: Residential Proximity to Methyl Bromide Use and Birth Outcomes in an Agricultural Population in California
Source: PubMed Central journal article supplement (PMC3672911; doi:10.1289/ehp.1205682), 2013-04-19
Supplement: ehp.1205682.s001.pdf [file ehp.1205682.s001.pdf]

**Supplemental Material**  
**Residential Proximity to Methyl Bromide Use and Birth Outcomes in  
an Agricultural Population in California**

Alison Gemmill, Robert B. Gunier, Asa Bradman, Brenda Eskenazi, Kim G. Harley

**Contents**

Supplemental Material, Table S1: Characteristics of study population, by trimester exposure.....2

Supplemental Material, Table S2: Categorical analysis of associations of proximity to any methyl bromide use (vs. none) in the first and third trimesters with fetal growth parameters and length of gestation.....4

Supplemental Material, Table S1. Characteristics [N (%)] of study population, by trimester exposure, CHAMACOS study, Salinas Valley, CA, 1999-2000 (N=442).

| <b>Characteristics</b>                                 | <b>All (N=442)</b> | <b>Trimester 1<br/>(N=338)</b> | <b>Trimester 2<br/>(N=408)</b> | <b>Trimester 3<br/>(N=390)</b> |
|--------------------------------------------------------|--------------------|--------------------------------|--------------------------------|--------------------------------|
| <b>Maternal Age</b>                                    |                    |                                |                                |                                |
| <20                                                    | 40 (9.1%)          | 27 (8.0%)                      | 36 (8.8%)                      | 31 (8.0%)                      |
| 20 – 24                                                | 163 (36.9%)        | 116 (34.3%)                    | 151 (37.0%)                    | 142 (36.4%)                    |
| 25 – 29                                                | 144 (32.6%)        | 114 (33.7%)                    | 134 (32.8%)                    | 129 (33.1%)                    |
| 30 – 34                                                | 66 (14.9%)         | 56 (16.6%)                     | 58 (14.2%)                     | 61 (15.6%)                     |
| ≥35                                                    | 29 (6.6%)          | 25 (7.4%)                      | 29 (7.1%)                      | 27 (6.9%)                      |
| <b>Parity</b>                                          |                    |                                |                                |                                |
| 0                                                      | 139 (31.5%)        | 89 (26.3%)                     | 129 (31.6%)                    | 114 (29.2%)                    |
| ≥1                                                     | 303 (68.6%)        | 249 (73.7%)                    | 279 (68.4%)                    | 276 (70.8%)                    |
| <b>Race/Ethnicity</b>                                  |                    |                                |                                |                                |
| Latina                                                 | 426 (96.4%)        | 328 (97.0%)                    | 394 (96.6%)                    | 375 (96.2%)                    |
| Non-Latina, White                                      | 7 (1.6%)           | 5 (1.5%)                       | 5 (1.2%)                       | 7 (1.8%)                       |
| Other                                                  | 9 (2.0%)           | 5 (1.5%)                       | 9 (2.2%)                       | 8 (2.1%)                       |
| <b>Marital Status</b>                                  |                    |                                |                                |                                |
| Married or living as married                           | 356 (80.5%)        | 281 (83.1%)                    | 329 (80.6%)                    | 317 (81.3%)                    |
| Unmarried                                              | 86 (19.5%)         | 57 (16.9%)                     | 79 (19.4%)                     | 73 (18.7%)                     |
| <b>Maternal education</b>                              |                    |                                |                                |                                |
| ≤ 6th grade                                            | 188 (42.5%)        | 143 (42.3%)                    | 171 (41.9%)                    | 168 (43.1%)                    |
| Some high school                                       | 158 (35.8%)        | 121 (35.8%)                    | 148 (36.3%)                    | 138 (35.4%)                    |
| High school graduate                                   | 96 (21.7%)         | 74 (21.9%)                     | 89 (21.8%)                     | 84 (21.5%)                     |
| <b>Family income</b>                                   |                    |                                |                                |                                |
| At or below poverty                                    | 272 (61.5%)        | 215 (63.6%)                    | 250 (61.3%)                    | 240 (61.5%)                    |
| Poverty – 200%                                         | 154 (34.8%)        | 109 (32.3%)                    | 144 (35.3%)                    | 137 (35.1%)                    |
| >200%                                                  | 16 (3.6%)          | 14 (4.1%)                      | 14 (3.4%)                      | 13 (3.3%)                      |
| <b>Country of birth</b>                                |                    |                                |                                |                                |
| United States                                          | 59 (13.4%)         | 41 (12.1%)                     | 54 (13.2%)                     | 54 (13.9%)                     |
| Mexico                                                 | 374 (84.6%)        | 292 (86.4%)                    | 345 (84.6%)                    | 327 (83.9%)                    |
| Other                                                  | 9 (2.0%)           | 5 (1.5%)                       | 9 (2.2%)                       | 9 (2.3%)                       |
| <b>Years of residence in the U.S.</b>                  |                    |                                |                                |                                |
| ≤ 5 years                                              | 230 (52.0%)        | 166 (49.1%)                    | 213 (52.2%)                    | 195 (50.0%)                    |
| 6 – 10 years                                           | 99 (22.4%)         | 82 (24.3%)                     | 92 (22.6%)                     | 92 (23.6%)                     |
| 11+ years                                              | 63 (14.3%)         | 56 (16.6%)                     | 58 (14.2%)                     | 58 (14.9%)                     |
| Entire life                                            | 50 (11.3%)         | 34 (10.1%)                     | 45 (11.0%)                     | 45 (11.5%)                     |
| <b>Work status during pregnancy</b>                    |                    |                                |                                |                                |
| Did not work                                           | 172 (38.9%)        | 127 (37.6%)                    | 156 (38.2%)                    | 153 (39.2%)                    |
| Some field or agricultural work                        | 181 (41.0%)        | 143 (42.3%)                    | 168 (41.2%)                    | 160 (41.0%)                    |
| Other work                                             | 89 (20.1%)         | 68 (20.1%)                     | 84 (20.6%)                     | 77 (19.7%)                     |
| <b>Prepregnancy body mass index (kg/m<sup>2</sup>)</b> |                    |                                |                                |                                |
| Underweight (<18.5)                                    | 2 (0.5%)           | 1 (0.3%)                       | 2 (0.5%)                       | 2 (0.5%)                       |

| <b>Characteristics</b>               | <b>All (N=442)</b> | <b>Trimester 1<br/>(N=338)</b> | <b>Trimester 2<br/>(N=408)</b> | <b>Trimester 3<br/>(N=390)</b> |
|--------------------------------------|--------------------|--------------------------------|--------------------------------|--------------------------------|
| Normal (18.5 – 24.9)                 | 170 (38.5%)        | 122 (36.1%)                    | 158 (38.7%)                    | 142 (36.4%)                    |
| Overweight (25 – 29.9)               | 175 (39.6%)        | 133 (39.4%)                    | 161 (39.5%)                    | 161 (41.3%)                    |
| Obese (>30)                          | 95 (21.5%)         | 82 (24.3%)                     | 87 (21.3%)                     | 85 (21.8%)                     |
| Smoked during pregnancy              |                    |                                |                                |                                |
| Yes                                  | 26 (5.9%)          | 18 (5.3%)                      | 23 (5.6%)                      | 23 (5.9%)                      |
| No                                   | 416 (94.1%)        | 320 (94.7%)                    | 385 (94.4%)                    | 367 (94.1%)                    |
| Any moves during pregnancy           |                    |                                |                                |                                |
| Yes                                  | 182 (41.2%)        | 78 (23.1%)                     | 148 (36.3%)                    | 136 (34.9%)                    |
| No                                   | 260 (58.8%)        | 260 (76.9%)                    | 260 (63.7%)                    | 254 (65.1%)                    |
| Low birth weight <sup>a</sup> infant |                    |                                |                                |                                |
| Yes                                  | 17 (3.9%)          | 12 (3.6%)                      | 16 (3.9%)                      | 17 (4.4%)                      |
| No                                   | 425 (96.2%)        | 326 (96.5%)                    | 392 (96.1%)                    | 373 (95.6%)                    |
| Preterm <sup>b</sup> infant          |                    |                                |                                |                                |
| Yes                                  | 30 (6.8%)          | 23 (6.8%)                      | 29 (7.1%)                      | 28 (7.2%)                      |
| No                                   | 412 (93.2%)        | 315 (93.2%)                    | 379 (92.9%)                    | 362 (92.8%)                    |

a Low birth weight is defined as <2,500 g

b Preterm birth is defined as <37 weeks' gestation

Supplemental Material, Table S2. Categorical analysis of associations [ $\beta$  (95% CI)] of proximity to any methyl bromide use (vs. none) in the first and third trimesters with fetal growth parameters and length of gestation, CHAMACOS study, Salinas Valley, CA, 1999-2000. (N=442)

| Group              | N   | Birth weight (g) <sup>a</sup> |                 | p-value | Length (cm) <sup>a</sup> |               | p-value | Head circumference (cm) <sup>a</sup> |               | p-value | Gestational age <sup>b</sup> |               | p-value |
|--------------------|-----|-------------------------------|-----------------|---------|--------------------------|---------------|---------|--------------------------------------|---------------|---------|------------------------------|---------------|---------|
| <b>Trimester 1</b> |     |                               |                 |         |                          |               |         |                                      |               |         |                              |               |         |
| 1 km: none         | 283 | Ref                           |                 |         | Ref                      |               |         | Ref                                  |               |         | Ref                          |               |         |
| 1 km: any          | 55  | -14.4                         | (-138.5, 109.8) | 0.82    | 0.08                     | (-0.60, 0.77) | 0.81    | 0.13                                 | (-0.25, 0.52) | 0.50    | 0.19                         | (-0.29, 0.67) | 0.44    |
| 3 km: none         | 136 | Ref                           |                 |         | Ref                      |               |         | Ref                                  |               |         | Ref                          |               |         |
| 3 km: any          | 202 | -27.7                         | (-122.1, 66.6)  | 0.56    | 0.07                     | (-0.45, 0.58) | 0.80    | -0.09                                | (-0.38, 0.21) | 0.56    | 0.39                         | (0.03, 0.75)  | 0.04    |
| 5 km: none         | 73  | Ref                           |                 |         | Ref                      |               |         | Ref                                  |               |         | Ref                          |               |         |
| 5 km: any          | 265 | -21.5                         | (-134.6, 91.5)  | 0.71    | -0.12                    | (-0.74, 0.50) | 0.71    | -0.15                                | (-0.50, 0.21) | 0.42    | 0.64                         | (0.21, 1.07)  | <0.01   |
| 8 km: none         | 49  | Ref                           |                 |         | Ref                      |               |         | Ref                                  |               |         | Ref                          |               |         |
| 8 km: any          | 289 | 16.2                          | (-113.8, 146.2) | 0.81    | 0.26                     | (-0.45, 0.97) | 0.48    | -0.11                                | (-0.52, 0.30) | 0.59    | 0.27                         | (-0.24, 0.78) | 0.30    |
| <b>Trimester 3</b> |     |                               |                 |         |                          |               |         |                                      |               |         |                              |               |         |
| 1 km: none         | 337 | Ref                           |                 |         | Ref                      |               |         | Ref                                  |               |         | Ref                          |               |         |
| 1 km: any          | 53  | -30.6                         | (-153.8, 92.7)  | 0.63    | 0.09                     | (-0.61, 0.79) | 0.80    | -0.02                                | (-0.42, 0.37) | 0.91    | -0.17                        | (-0.69, 0.35) | 0.53    |
| 3 km: none         | 164 | Ref                           |                 |         | Ref                      |               |         | Ref                                  |               |         | Ref                          |               |         |
| 3 km: any          | 226 | -5.2                          | (-90.2, 79.8)   | 0.90    | 0.07                     | (-0.41, 0.55) | 0.78    | -0.21                                | (-0.48, 0.06) | 0.13    | 0.23                         | (-0.12, 0.59) | 0.20    |
| 5 km: none         | 99  | Ref                           |                 |         | Ref                      |               |         | Ref                                  |               |         | Ref                          |               |         |
| 5 km: any          | 291 | -3.2                          | (-100.2, 93.8)  | 0.95    | -0.01                    | (-0.56, 0.53) | 0.97    | -0.27                                | (-0.58, 0.04) | 0.09    | 0.20                         | (-0.21, 0.61) | 0.33    |
| 8 km: none         | 73  | Ref                           |                 |         | Ref                      |               |         | Ref                                  |               |         | Ref                          |               |         |
| 8 km: any          | 317 | -22.7                         | (-130.7, 85.3)  | 0.68    | -0.11                    | (-0.72, 0.49) | 0.72    | -0.25                                | (-0.60, 0.09) | 0.15    | 0.22                         | (-0.24, 0.68) | 0.34    |

a Adjusted for maternal age, parity, prepregnancy body mass index, poverty, country of birth, week of initiating prenatal care, gestational age, and gestational age squared.

b Adjusted for maternal age, parity, prepregnancy body mass index, poverty, country of birth, and week of initiating prenatal care.
